# Supplementary material
Source: PubMed Central journal article supplement (PMC4001812)
Supplement: NIHMS563677-supplement-supplementary_fig__6.pdf [file NIHMS563677-supplement-supplementary_fig__6.pdf]

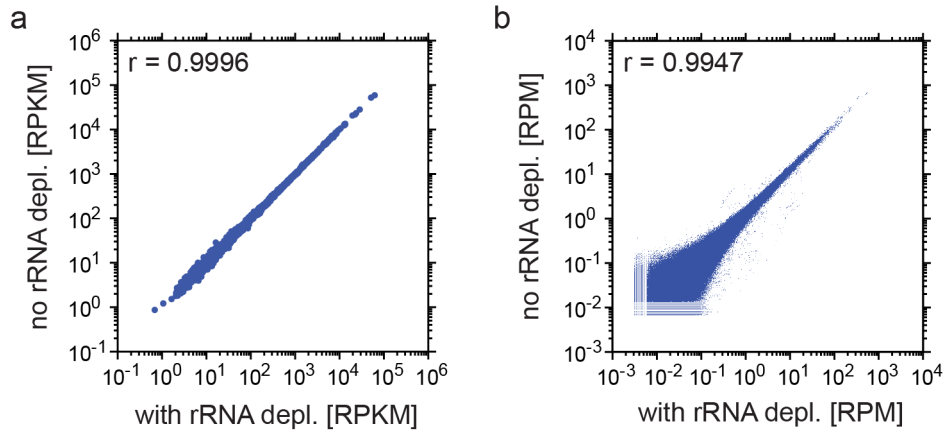

**Comparison of translome data including and excluding an rRNA depletion step during the library preparation.**

*E. coli* MC4100  $\Delta$ *tig::Kan* + pTrc-*tig*-TEV-Avi cells were grown in LB medium, harvested according to the rapid protocol (step 1, option C), and *ex vivo* crosslinked with EDC (step 7, option B). After polysome digest ribosomes were isolated in sucrose gradient ultracentrifugation (step 18, option B). Isolated footprint fragments were used to prepare a sequencing library including ('with rRNA depl.') or excluding ('no rRNA depl.') an rRNA depletion step. Footprint fragments were sequenced (step 96 of the Supplementary Methods) and data were analyzed in the basic and specific analysis (steps 35–59). (a) Gene expression analysis and (b) read densities along protein coding regions were determined as described in the legend to Fig. 2a and c, respectively.
